# Supplementary material for: Oxytetracycline hyper-production through targeted genome reduction of Streptomyces rimosus
Source: PubMed Central journal article supplement (PMC11097637; doi:10.1128/msystems.00250-24), 2024-04-02

Legend: Clustering analysis of RNA-seq data with gene identifiers

-8.53046 0 9.17247

log2FC\_ATCCvsd145k\_24  
log2FC\_ATCCvsd145k\_50  
log2FC\_ATCCvs240kb\_24  
log2FC\_ATCCvs240kb\_50

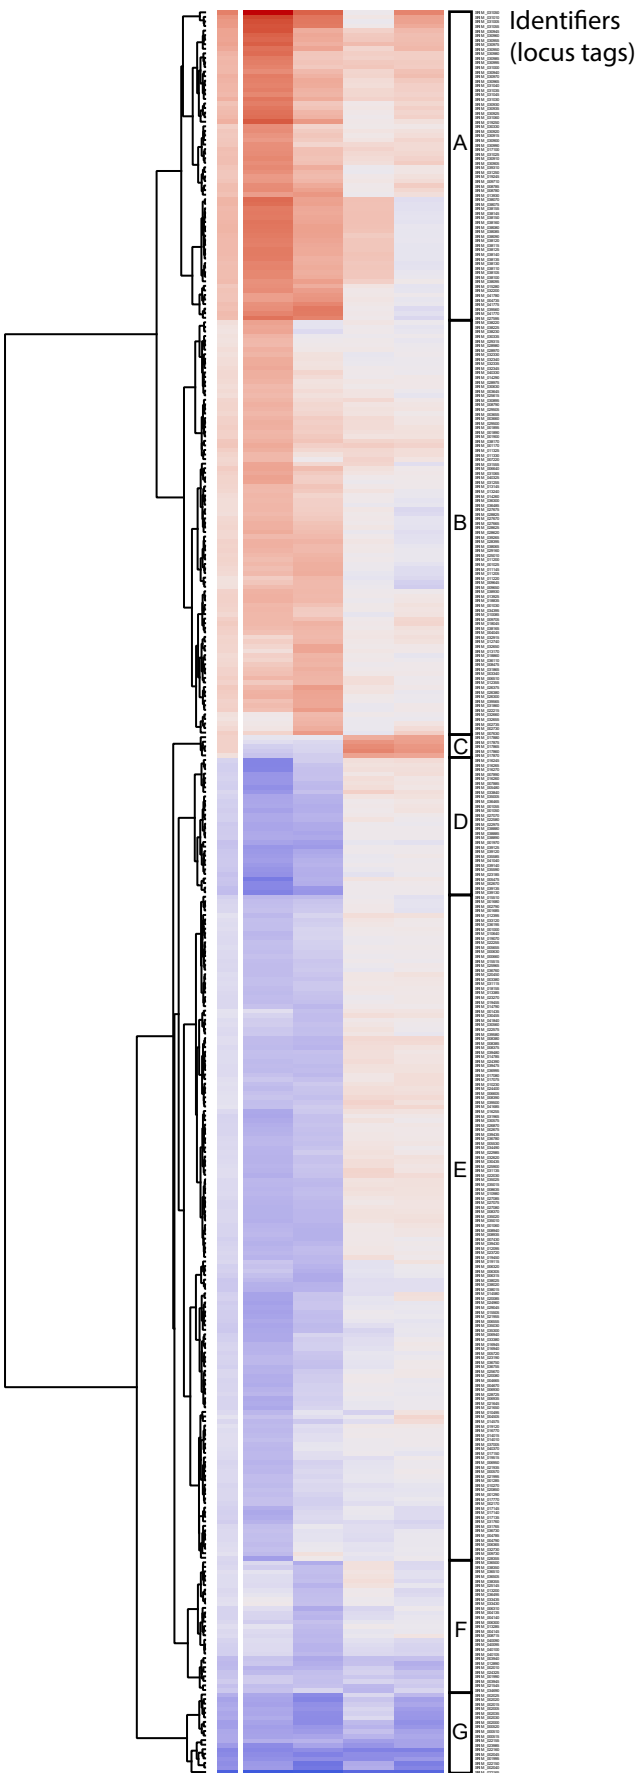

Supplement: msystems.00250-24-s0002.pdf [file msystems.00250-24-s0002.pdf]
